# Supplementary material
Source: ML conference proceedings conference paper supplement (https://proceedings.neurips.cc/paper_files/paper/2022/hash/b37aa1d677970f2f56d0d17410c52b3b-Abstract.html)
Supplement: Supplementary file 1 [file b37aa1d677970f2f56d0d17410c52b3b-Supplemental-Conference.zip]

Archive with 2 entries (2 files):
- OCLR_neurips_supplementary_camera_ready.pdf
- OCLR_supplementary_video.mp4
